# Supplementary material for: Microspheric hierarchical controlled-release system and cell growth platform achieves sequential dual-exosomes delivery and promote bone regeneration
Source: Research Square preprint supplement (doi:10.21203/rs.3.rs-6874144/v1), 2025-06-19

Supporting Information

**Microspheric hierarchical controlled-release system and cell growth platform achieves sequential dual-exosomes delivery and promote bone regeneration**

*Yihan Wang***†***, Huixin Lv***†***, Jingxia Chen, Yangfan Pei, Xiuyu Liu, Sheng Chen, Siyu Chen, Xuyan Wei, Jiameng Zhang, Jingjie Zhai*, Yanmin Zhou**

Department of Oral Implantology, Hospital of Stomatology, Jilin University, Changchun, 130021, China.

Jilin Provincial Key Laboratory of Tooth Development and Bone Remodeling, Hospital of Stomatology, Jilin University, Changchun, 130021, China.

**Corresponding Authors:**

*Jingjie Zhai, E-mail: zhaijingjie@jlu.edu.cn

*Yanmin Zhou, E-mail: zhouym@jlu.edu.cn

**†These authors contributed equally to this work.**


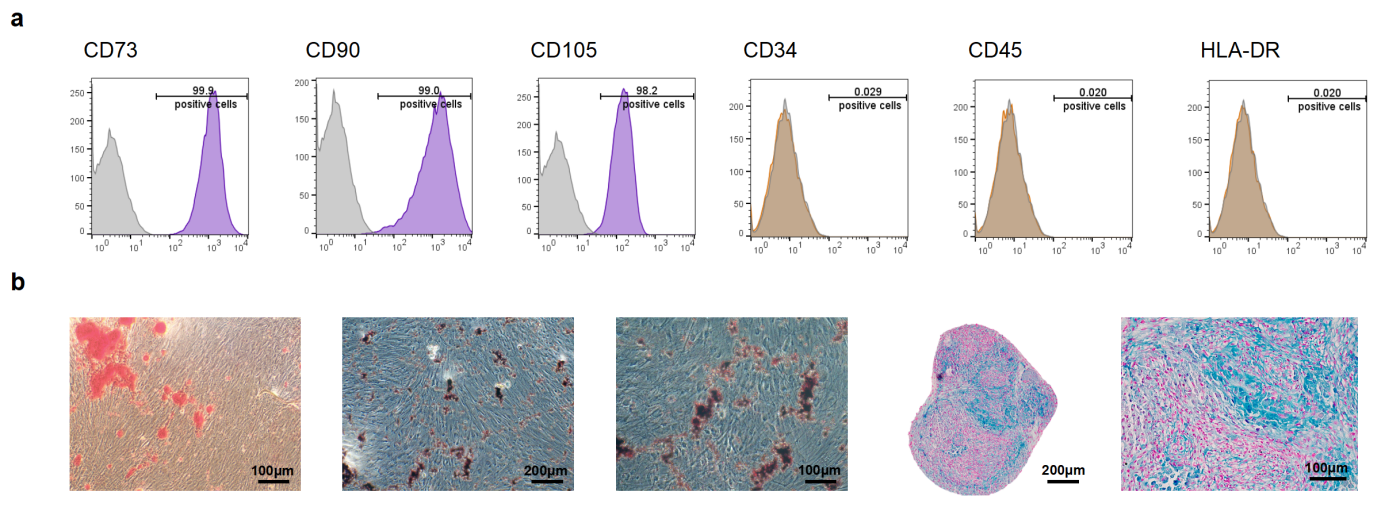


**Fig. S1.** Characterization of stem cell properties in PMSCs. (a) Flow cytometry analysis showing that LMSCs were positive for CD73 (99.9%), CD90 (99.0%), and CD105 (98.2%), while negative for CD34 (0.029%), CD45 (0.020%), and HLA-DR (0.020%). (b) Evaluation of the trilineage differentiation potential of PMSCs.


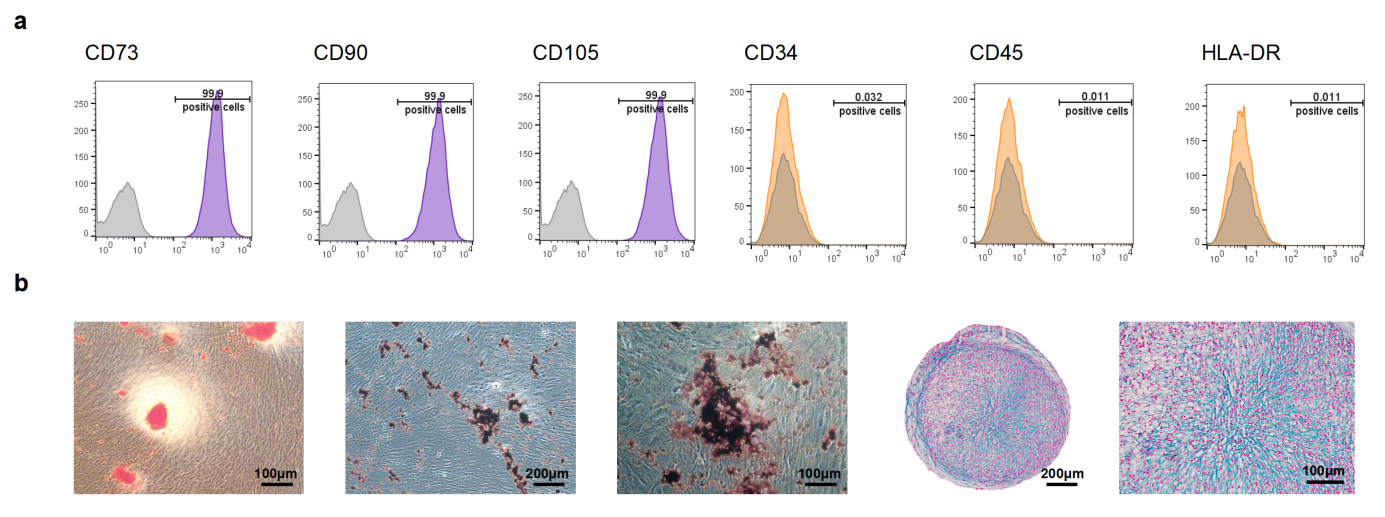


**Fig. S2.** Characterization of stem cell properties in LMSCs. (a) Flow cytometry analysis demonstrating that LMSCs were positive for CD73 (99.9%), CD90 (99.9%), and CD105 (99.9%), while negative for CD34 (0.032%), CD45 (0.011%), and HLA-DR (0.011%). (b) Assessment of the trilineage differentiation potential of LMSCs.


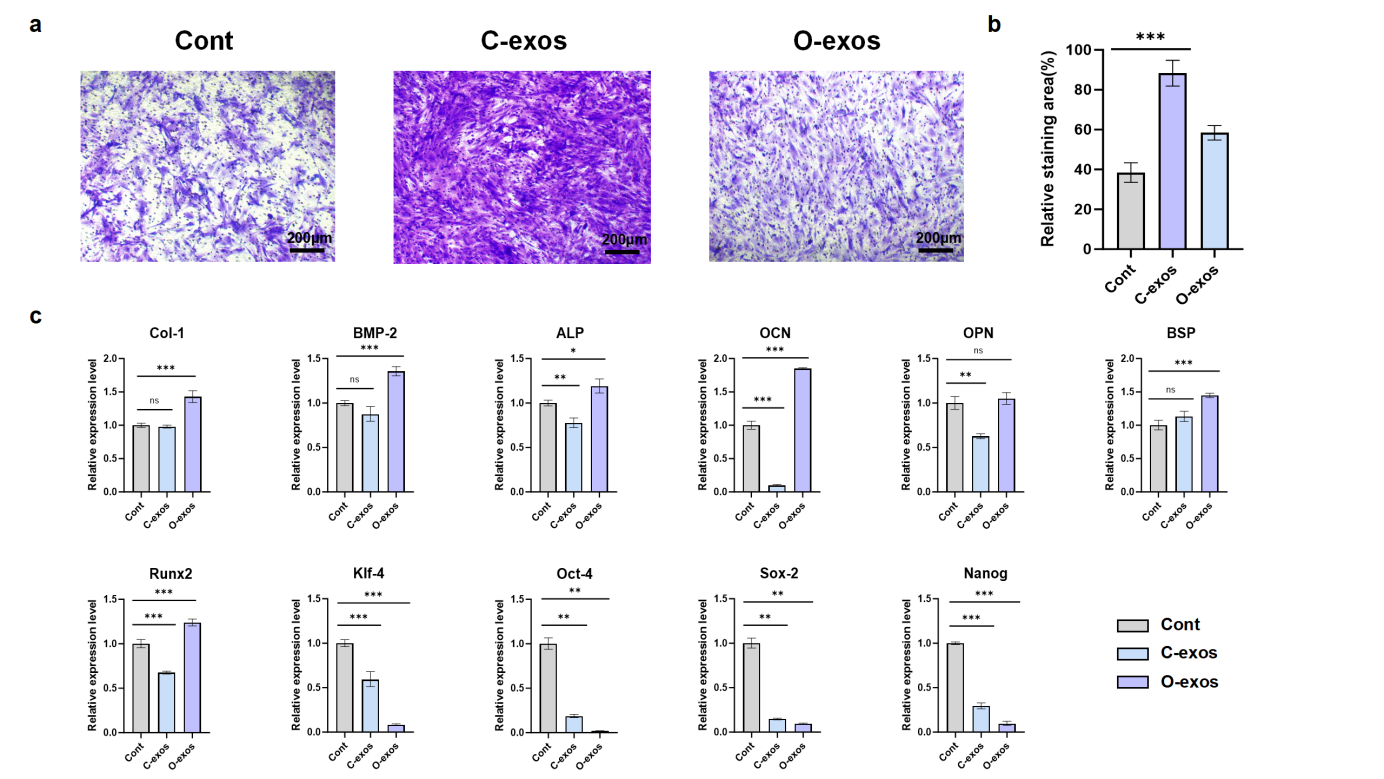


**Fig. S3.** Functional assessment of PMSCs-derived exosomes. (a,b) Transwell migration assay evaluating the migratory effects of C-exos and O-exos on LMSCs, with quantitative analysis. (c) RT-qPCR analysis of osteogenesis-related mRNA and stemness-associated mRNA expression levels in LMSCs.


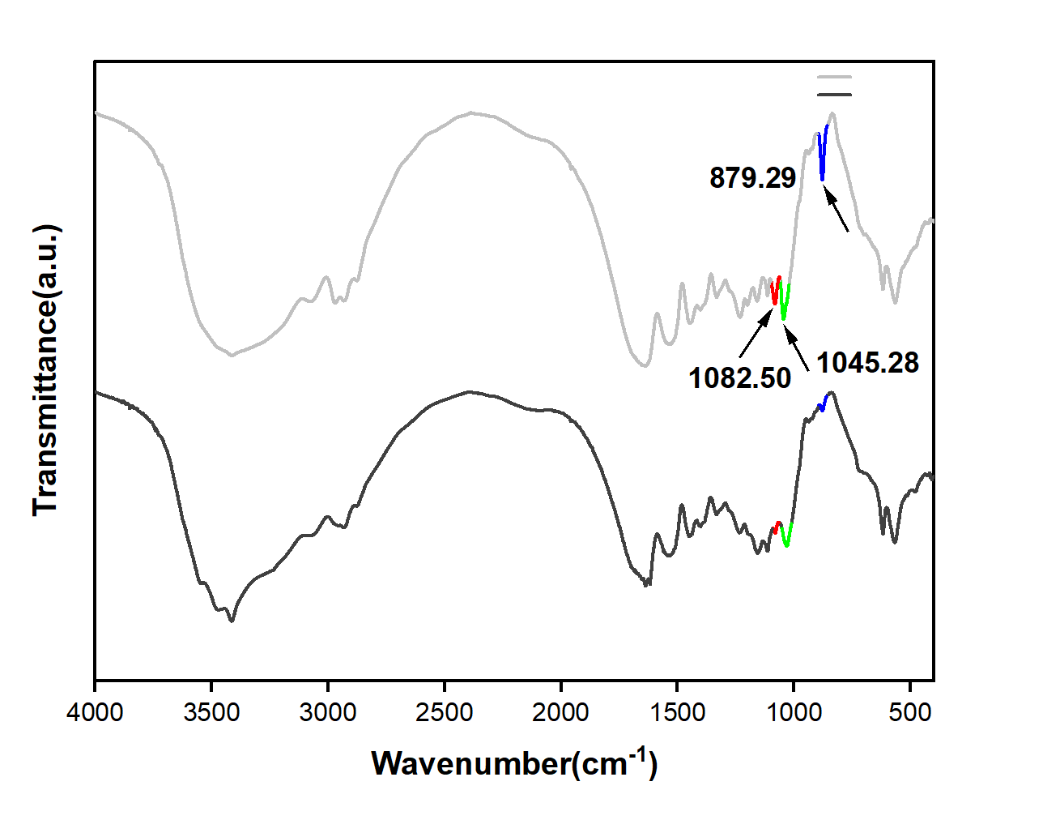


**Fig. S4.** The functional groups and covalent bond formation in GMs and GMsC-exos were assessed by FTIR.


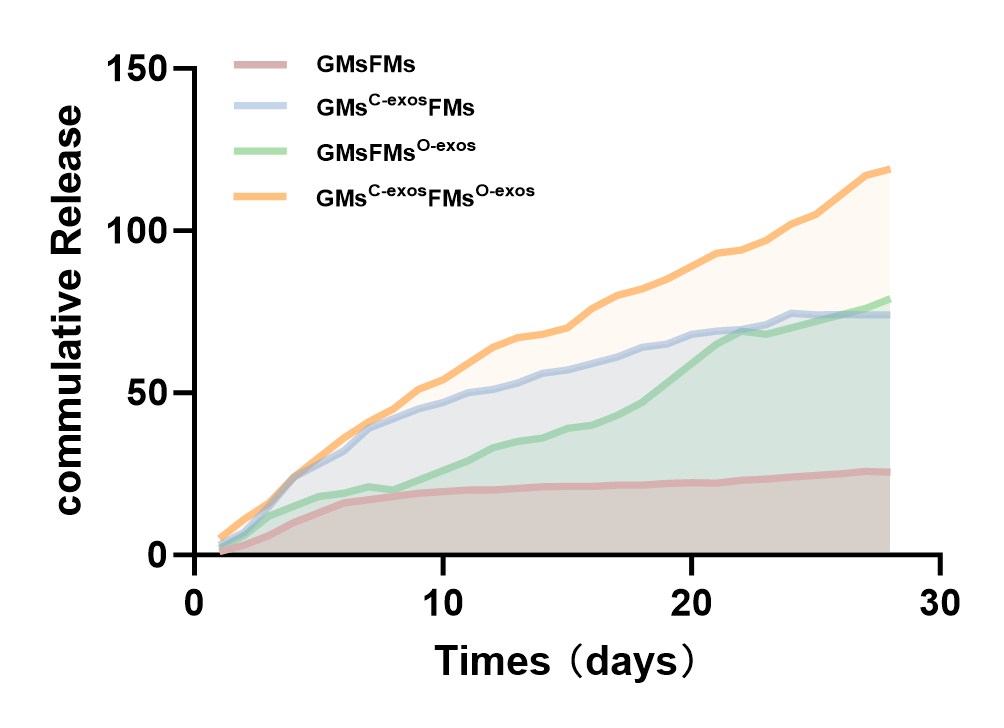


**Fig. S5.** Cumulative release profile of exosomes from GMsC-exosFMsO-exos over 28 days.


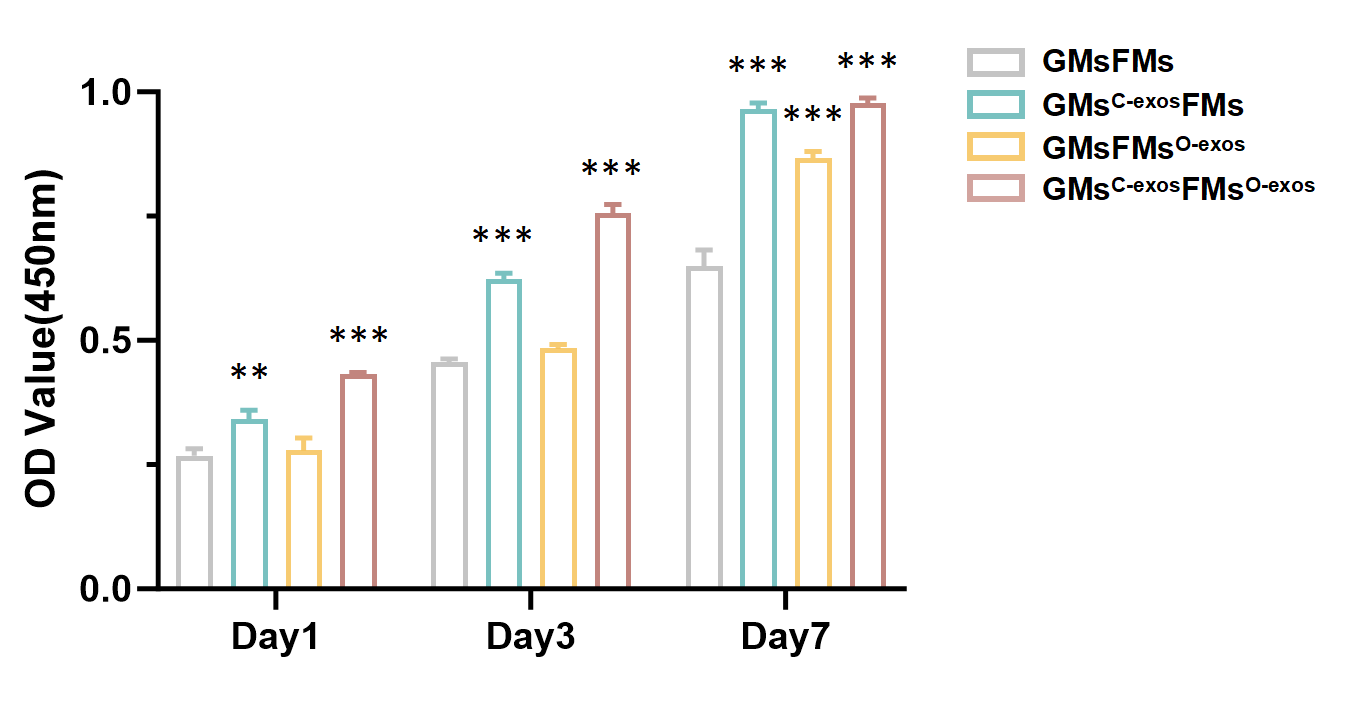


**Fig. S6.** CCK-8 evaluating the viability and proliferation of LMSCs co-cultured with nested microspheres at days 1, 3, and 7.


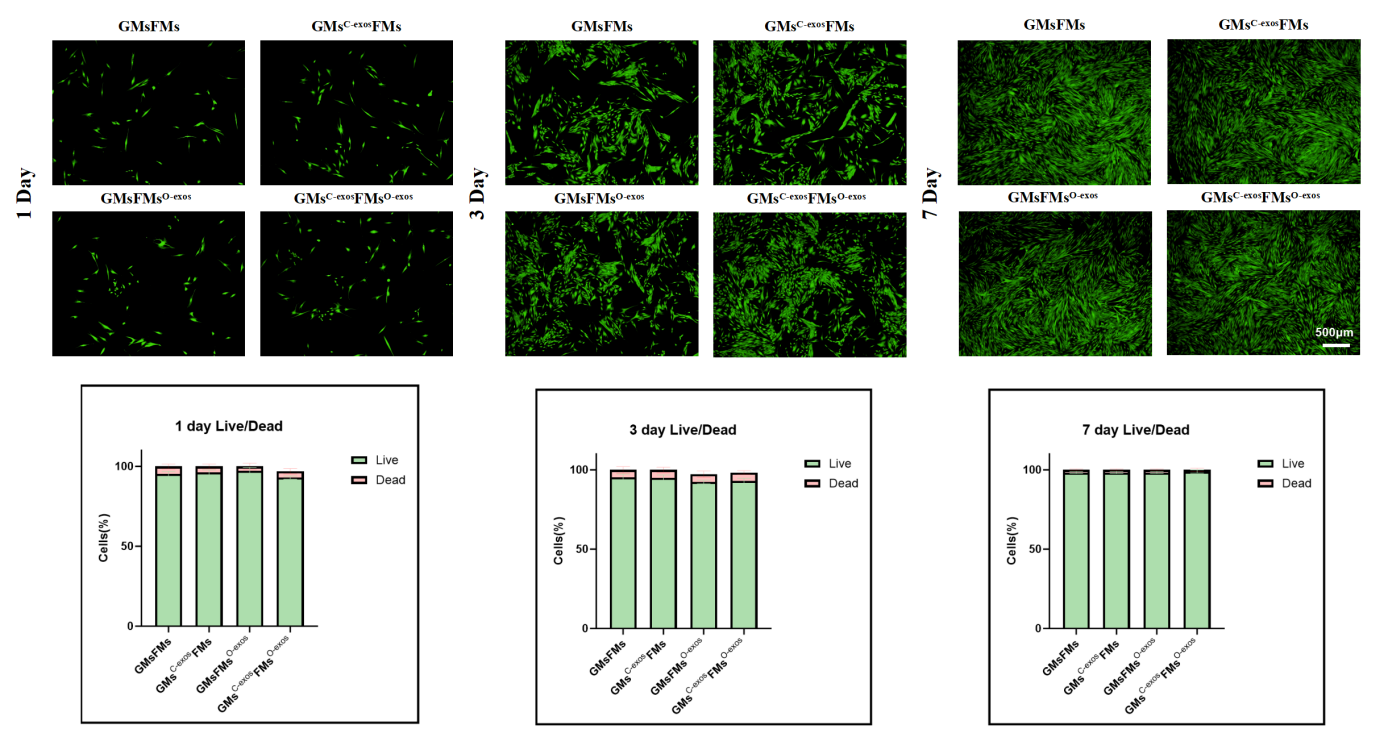


**Fig. S7.** Assessment of cytotoxicity and biocompatibility of nested microspheres in vitro. Live/Dead cell staining assay showing representative fluorescence images and quantitative analysis of LMSCs at days 1, 3, and 7. Live cells are stained green, while dead cells are stained red.


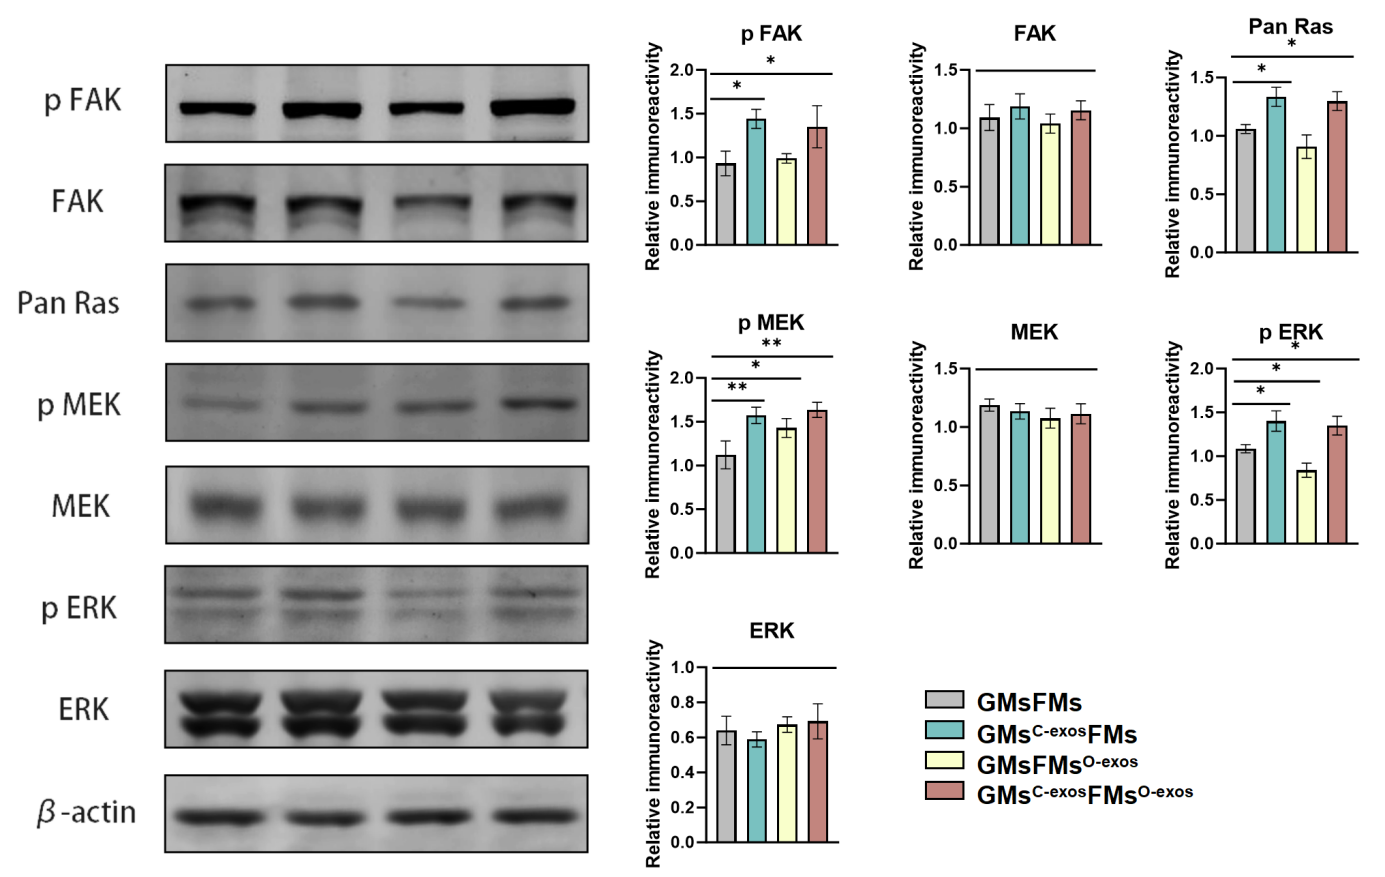


**Fig. S8.** Western Blot analysis was performed to assess the protein expression and relative phosphorylation levels of p FAK, Pan Ras, p MEK,and p ERK in LMSCs after 7 days of co-culture. β-actin was used as an internal control.


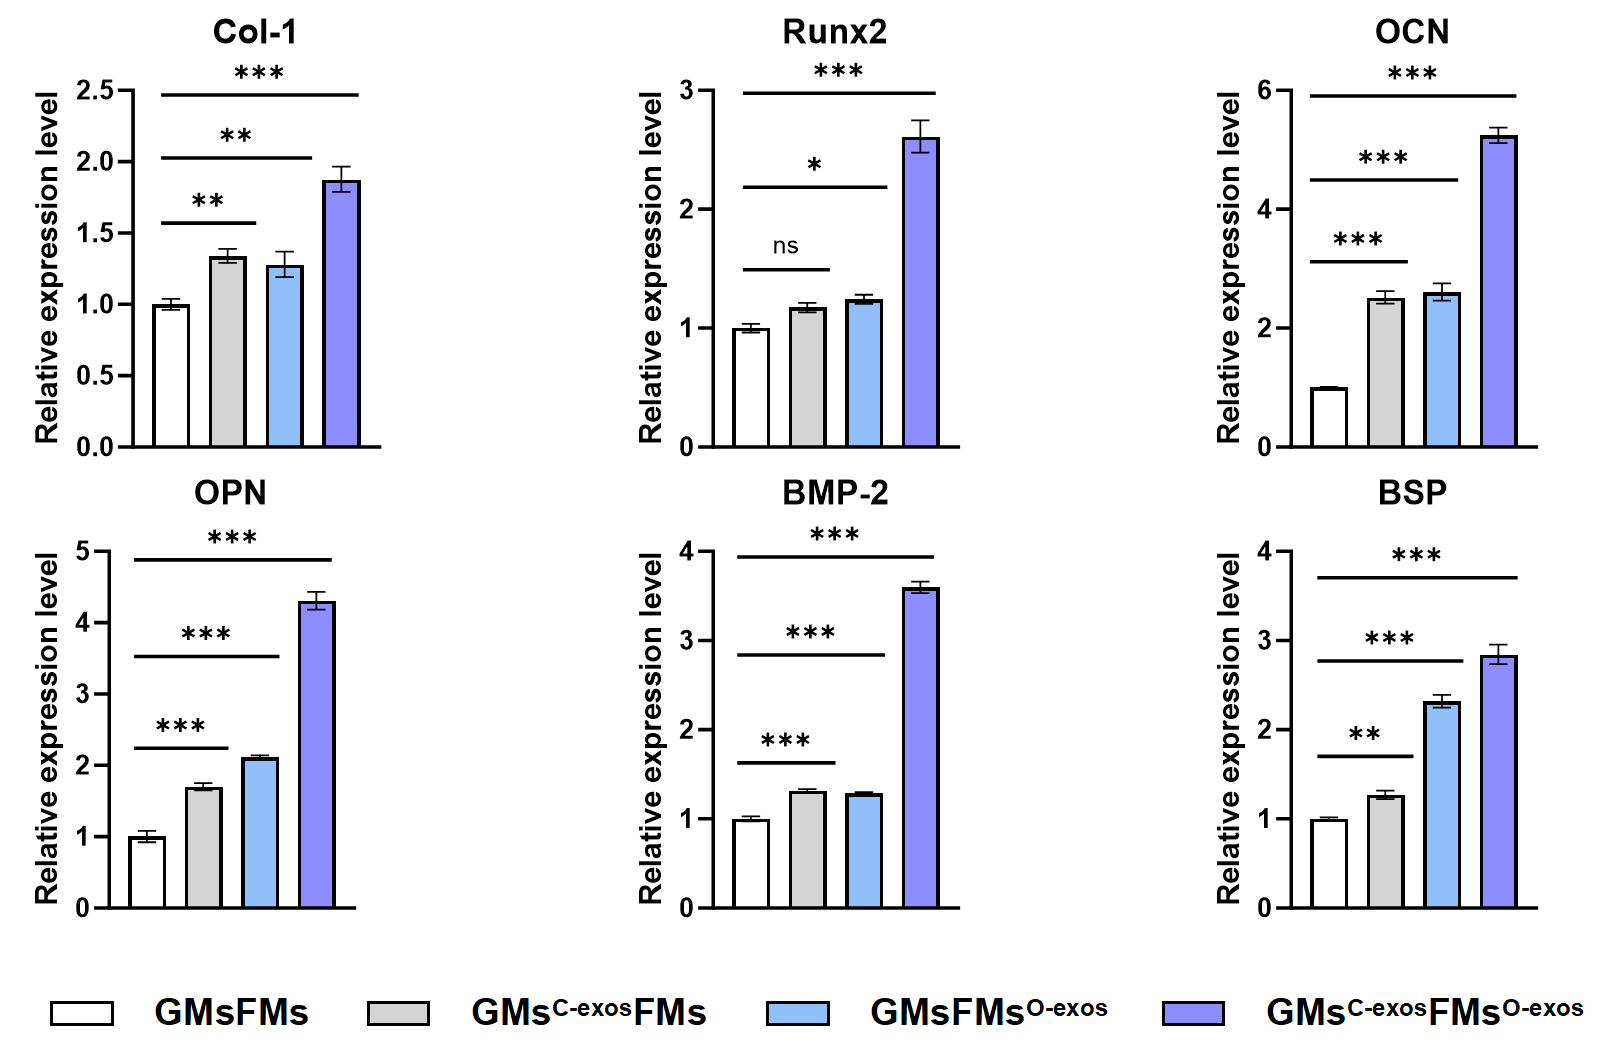


**Fig. S9.** RT-qPCR analysis of osteogenesis-related mRNA expression in LMSCs after 14 days of co-culture with different groups of nested microspheres.


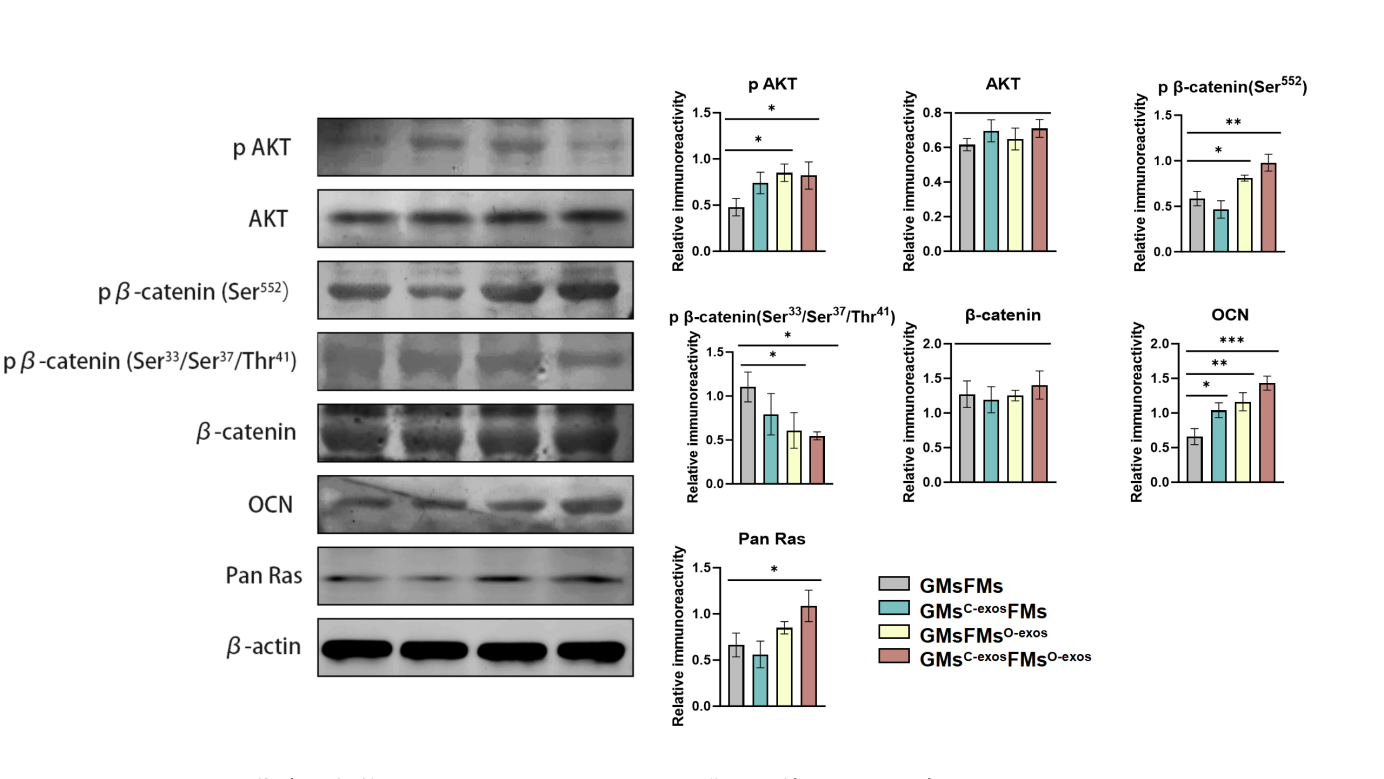


**Fig. S10.** Western Blot analysis was performed to assess the protein expression and relative phosphorylation levels of p Akt, p β-catenin (Ser33/Ser37/Thr41), p β-catenin (Ser552), OCN, Pan-Ras in LMSCs after 3 days of co-culture. β-actin was used as an internal control.


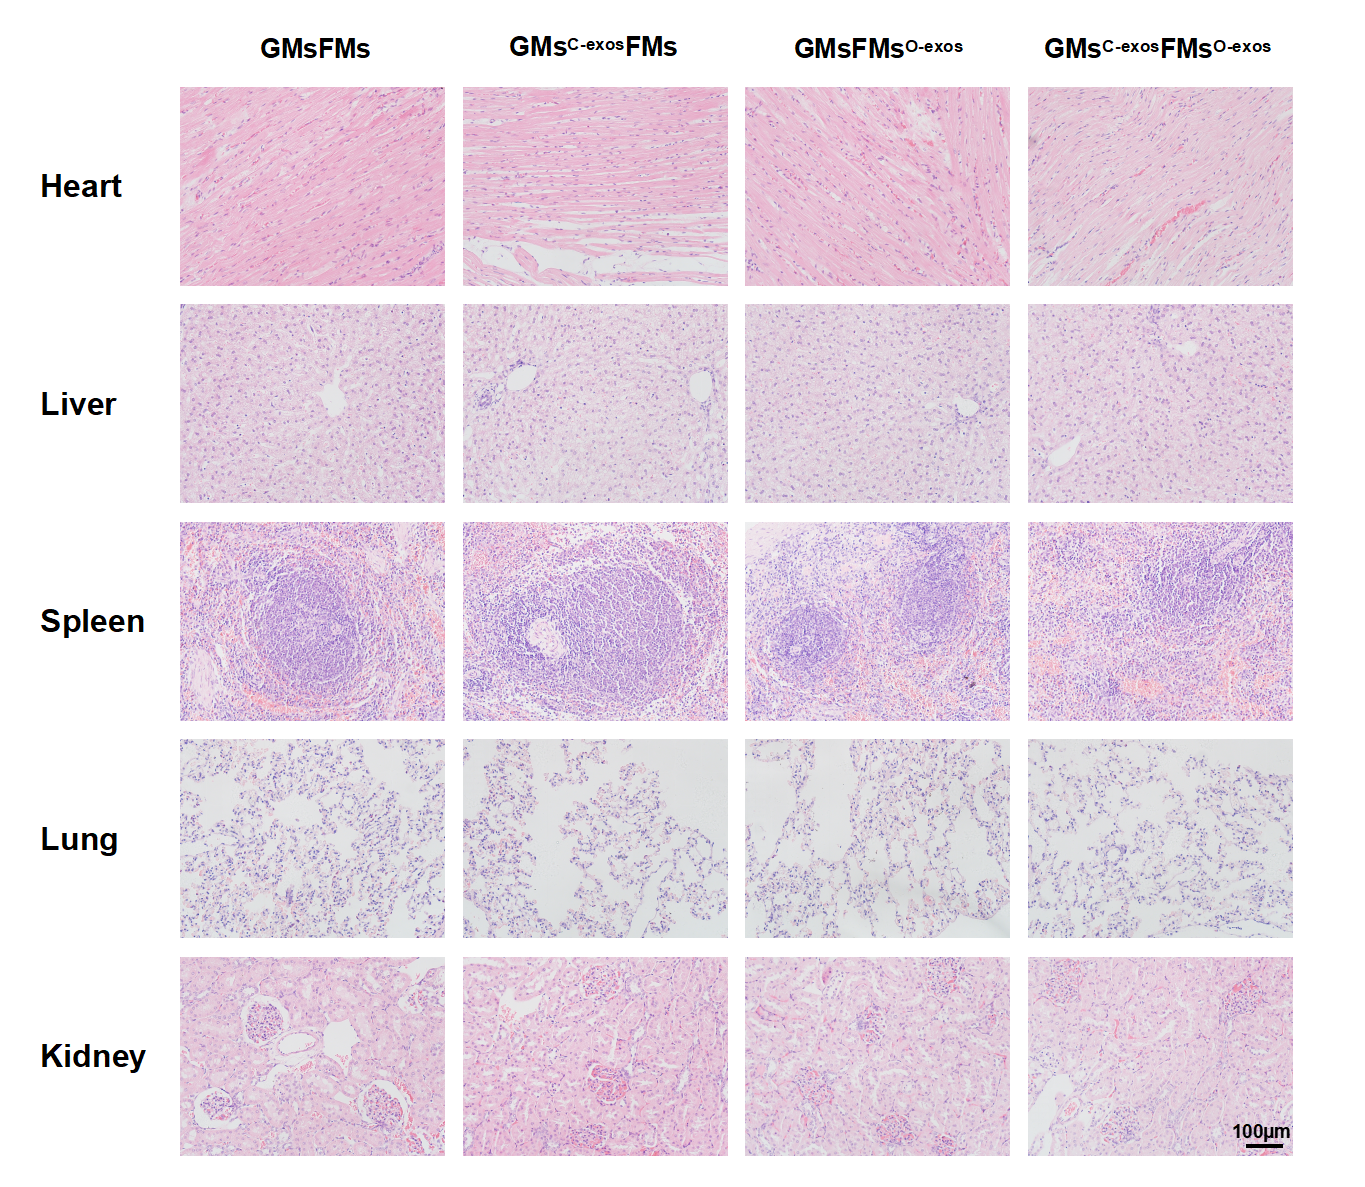


**Fig. S11.** All organs exhibited normal tissue morphology with no evident pathological alterations.


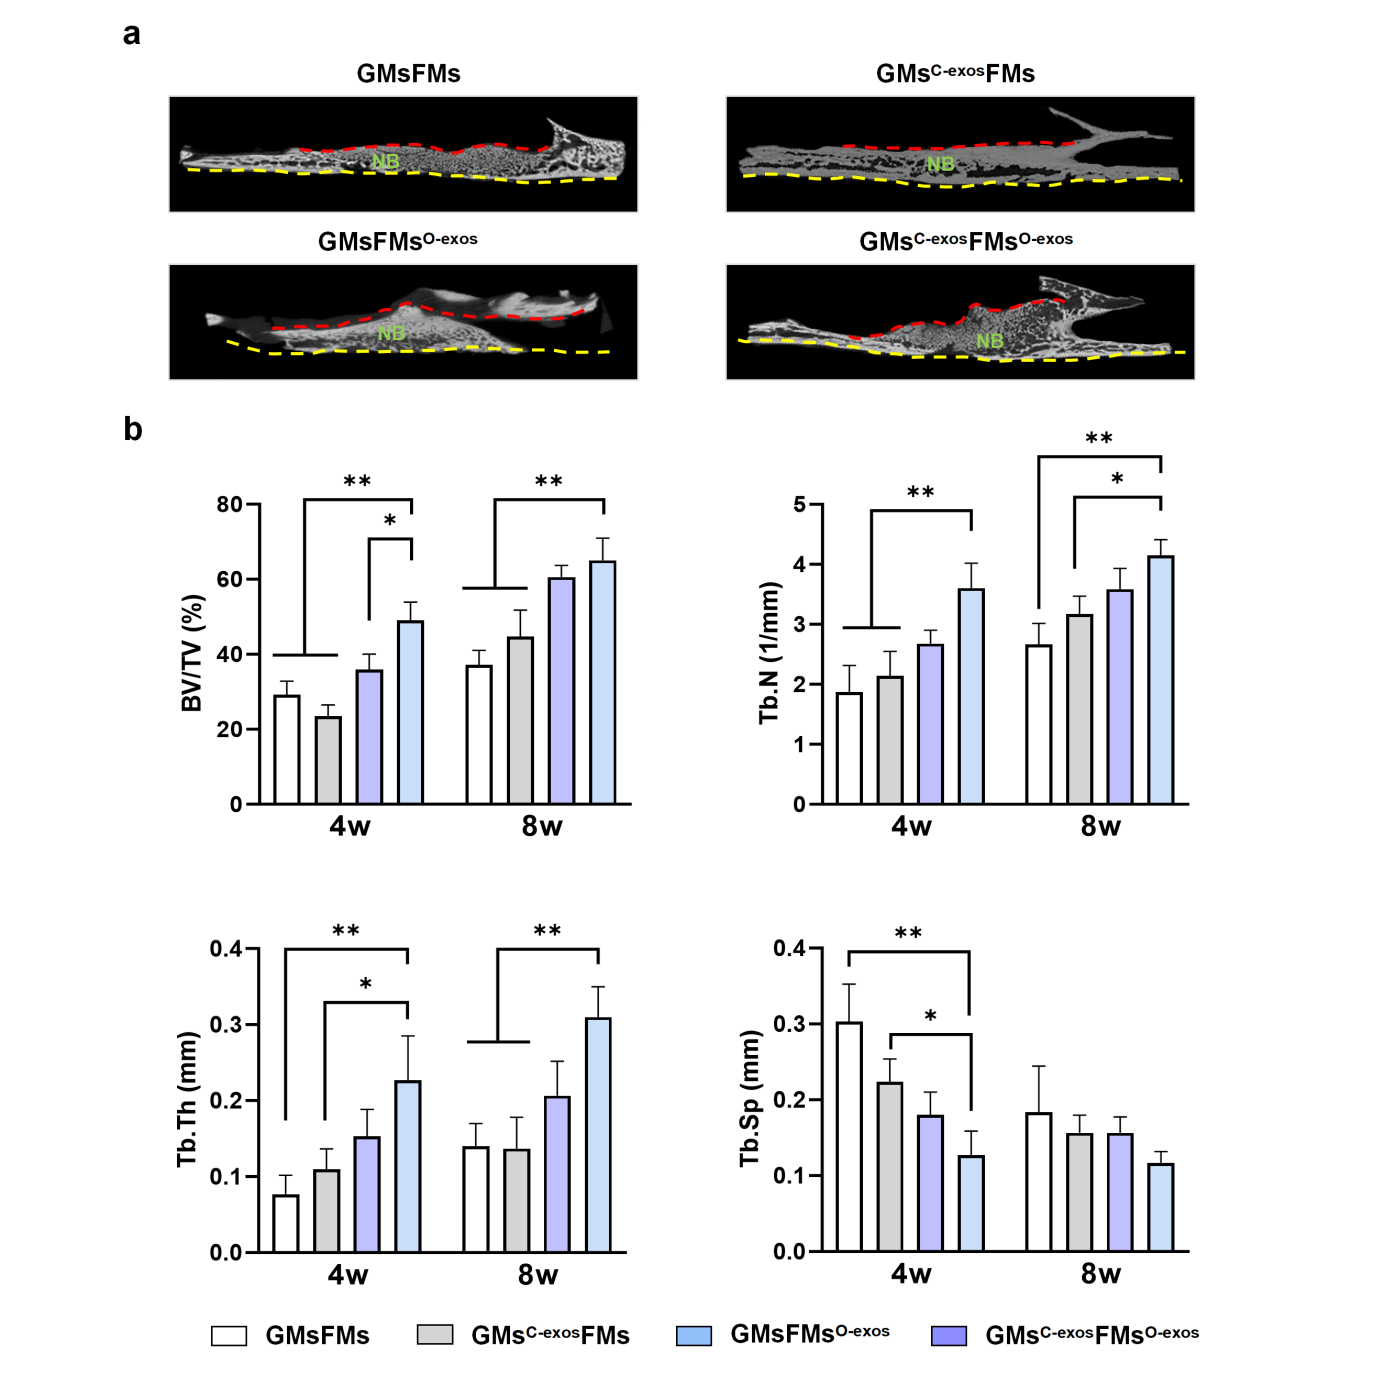


**Fig. S12.** Micro-CT three-dimensional reconstruction assessing new bone formation in the rabbit maxillary sinus floor elevation region. (a) Micro-CT evaluation of new bone regeneration. (b) Precise quantitative analysis of bone formation beneath the Schneiderian membrane, including bone volume/tissue volume (BV/TV), trabecular number (Tb.N), trabecular separation (Tb.Sp), and trabecular thickness (Tb.Th).


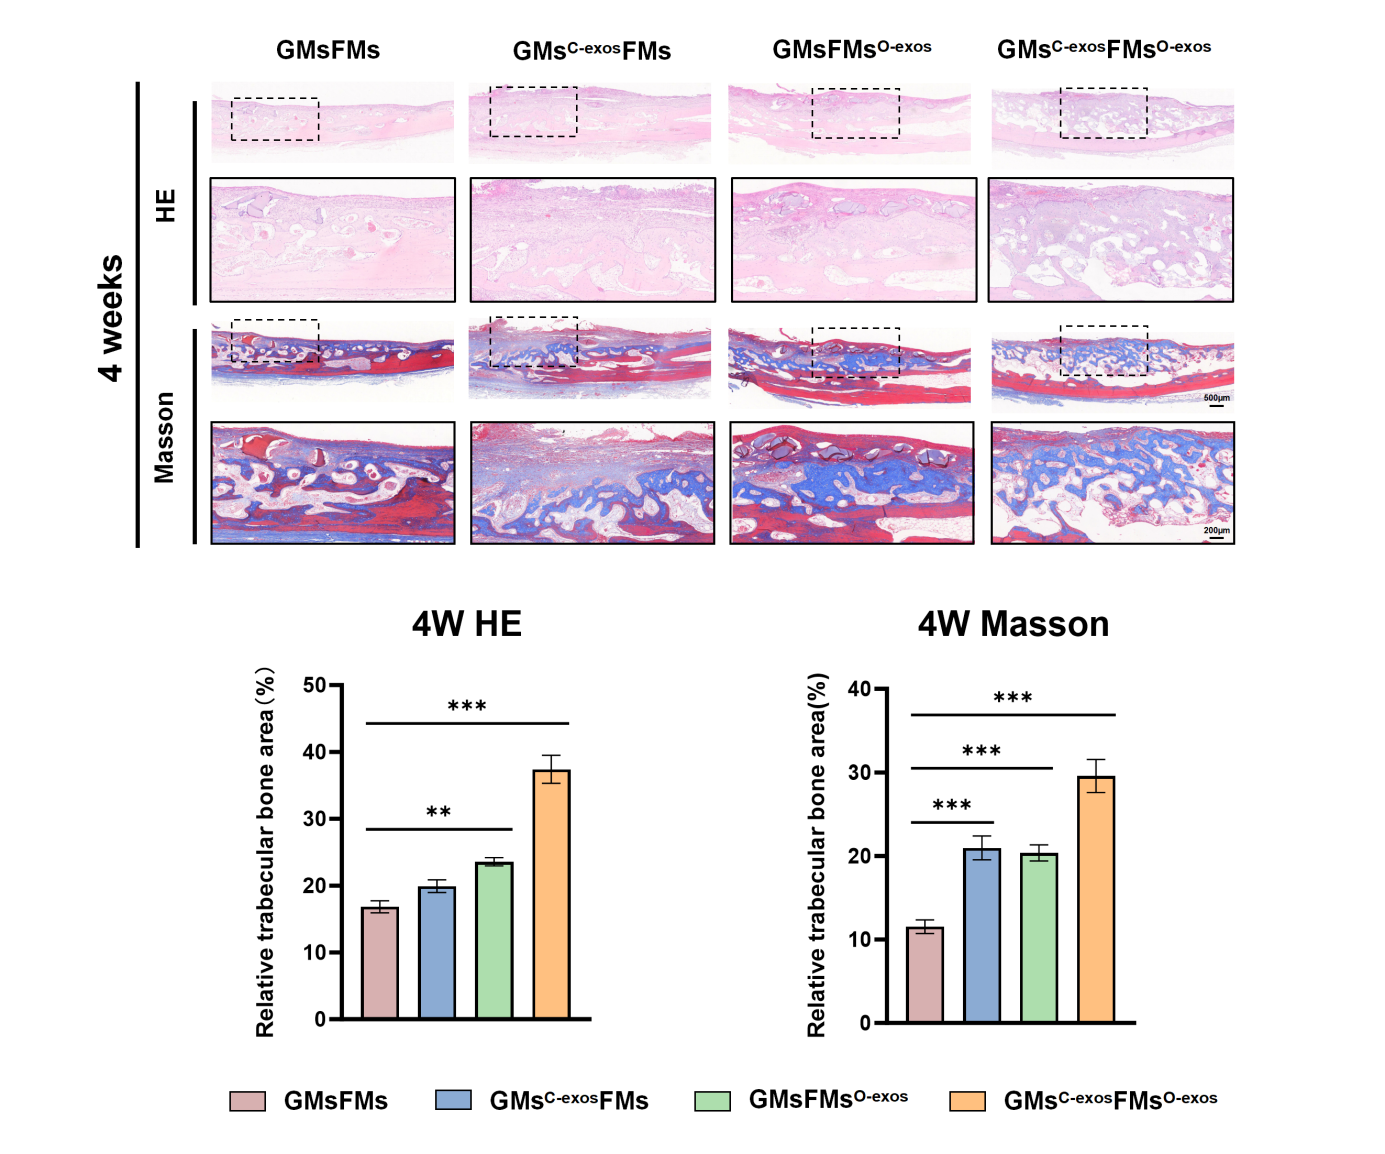


**Fig. S13.** H&E and Masson’s staining were used to evaluate the morphology and structural integrity of newly formed bone tissue, as well as collagen fiber deposition, with quantitative analysis. NB: newly mineralized bone.


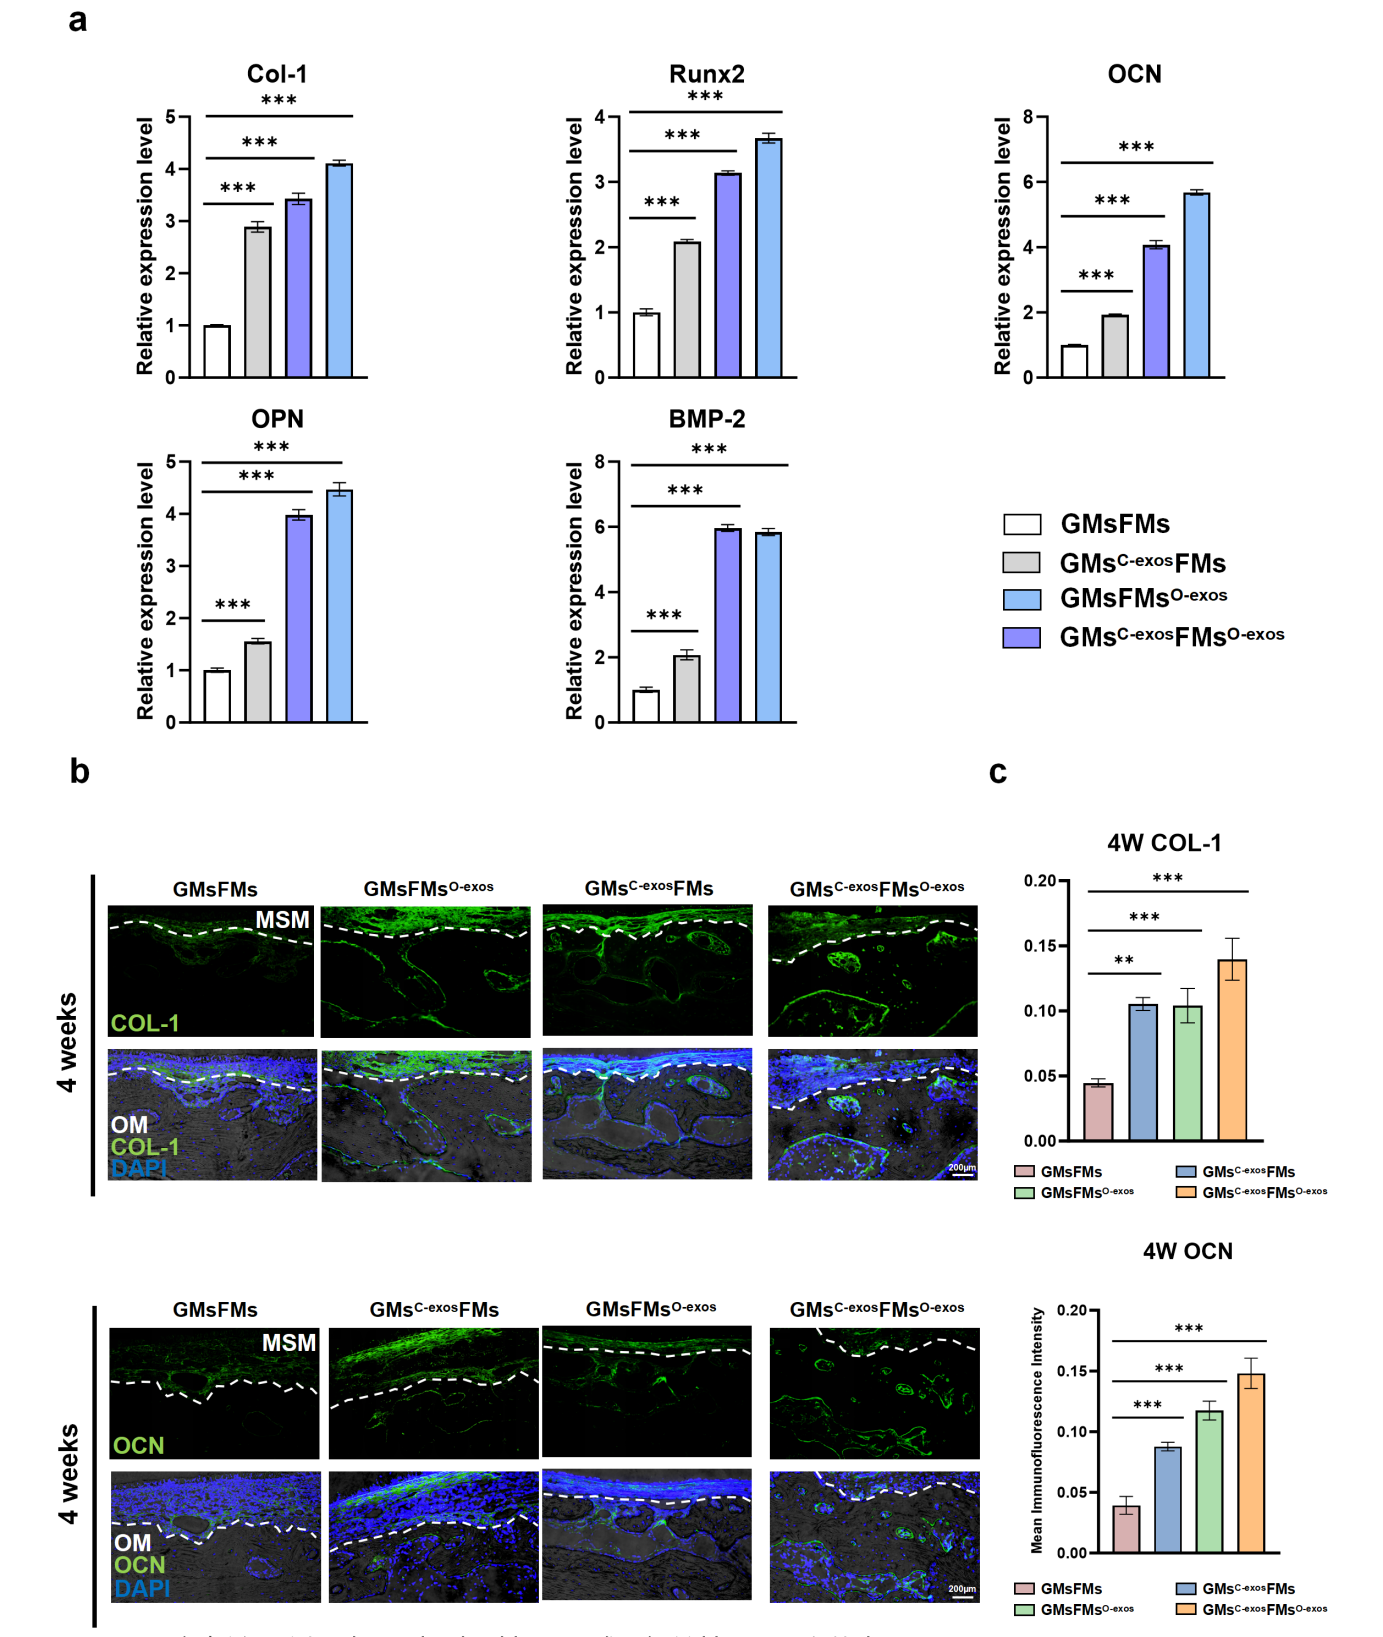


**Fig. S14.** Expression of osteogenesis-related genes and proteins in the MSM elevation region at 4 weeks (a) RT-qPCR analysis of osteogenesis-related mRNA expression in regenerated bone tissue. (b,c) Representative immunofluorescence images and quantitative analysis of Col-1 and OCN expression in the vicinity of the MSM.


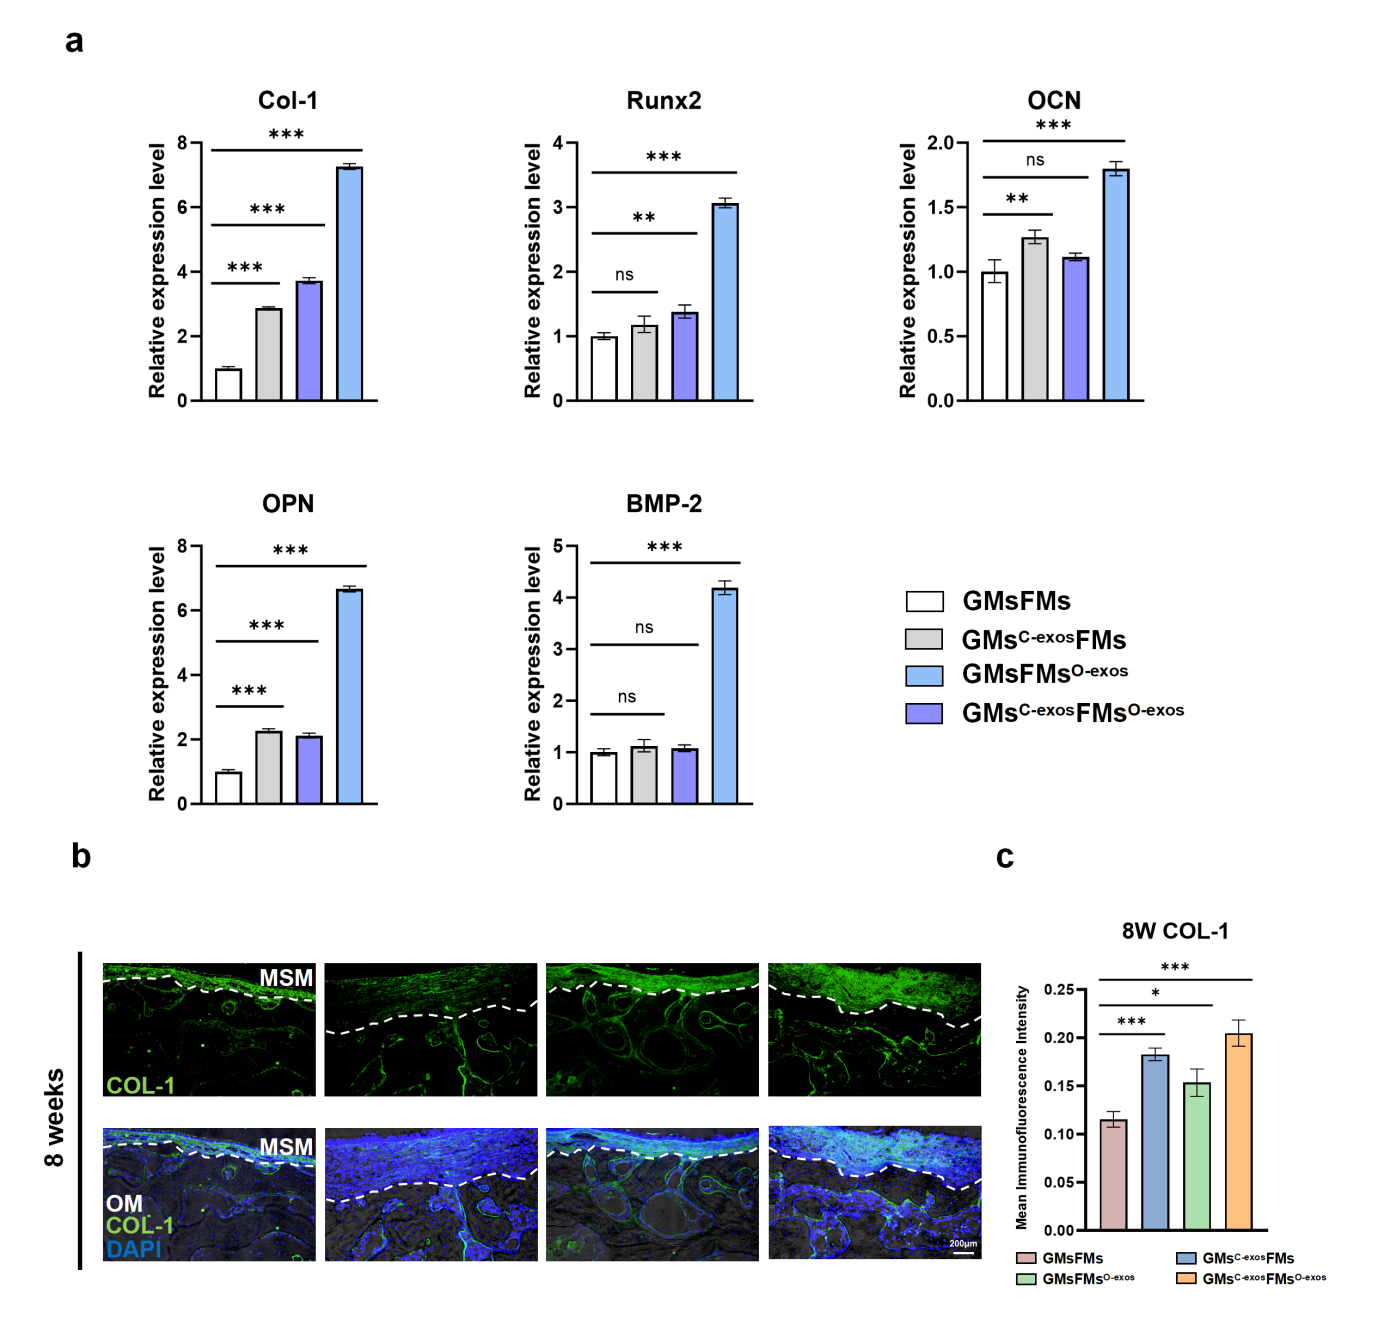


**Fig. S15.** Expression of osteogenesis-related genes and proteins in the MSM elevation region at 8 weeks. (a) RT-qPCR analysis of osteogenesis-related mRNA expression in regenerated bone tissue. (b,c) Representative immunofluorescence images and quantitative analysis of OCN expression in the vicinity of the MSM.

**Table S1.** Primer sequences used in RT-qPCR.


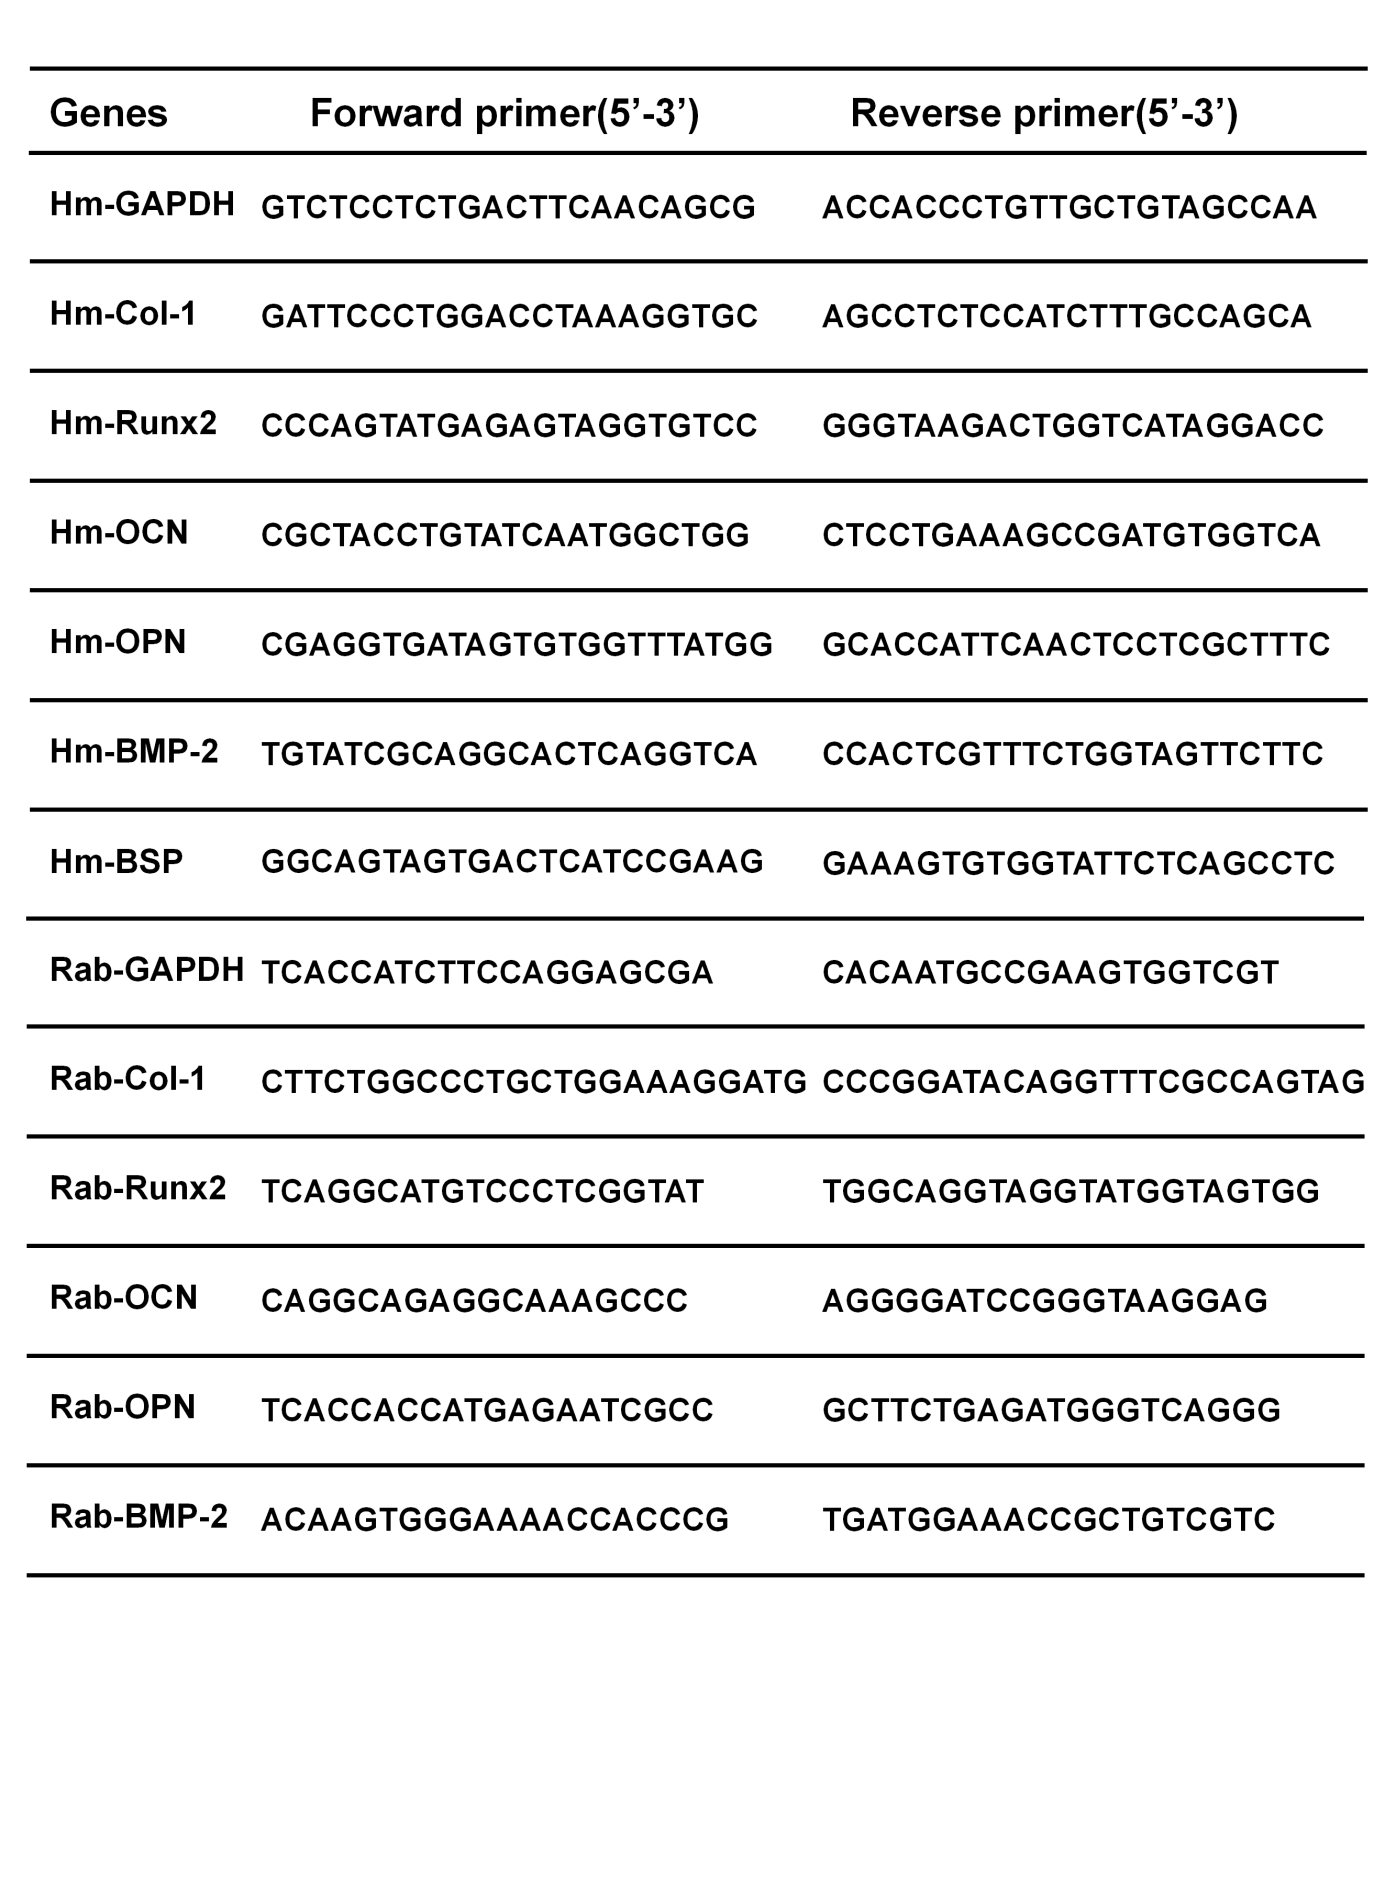


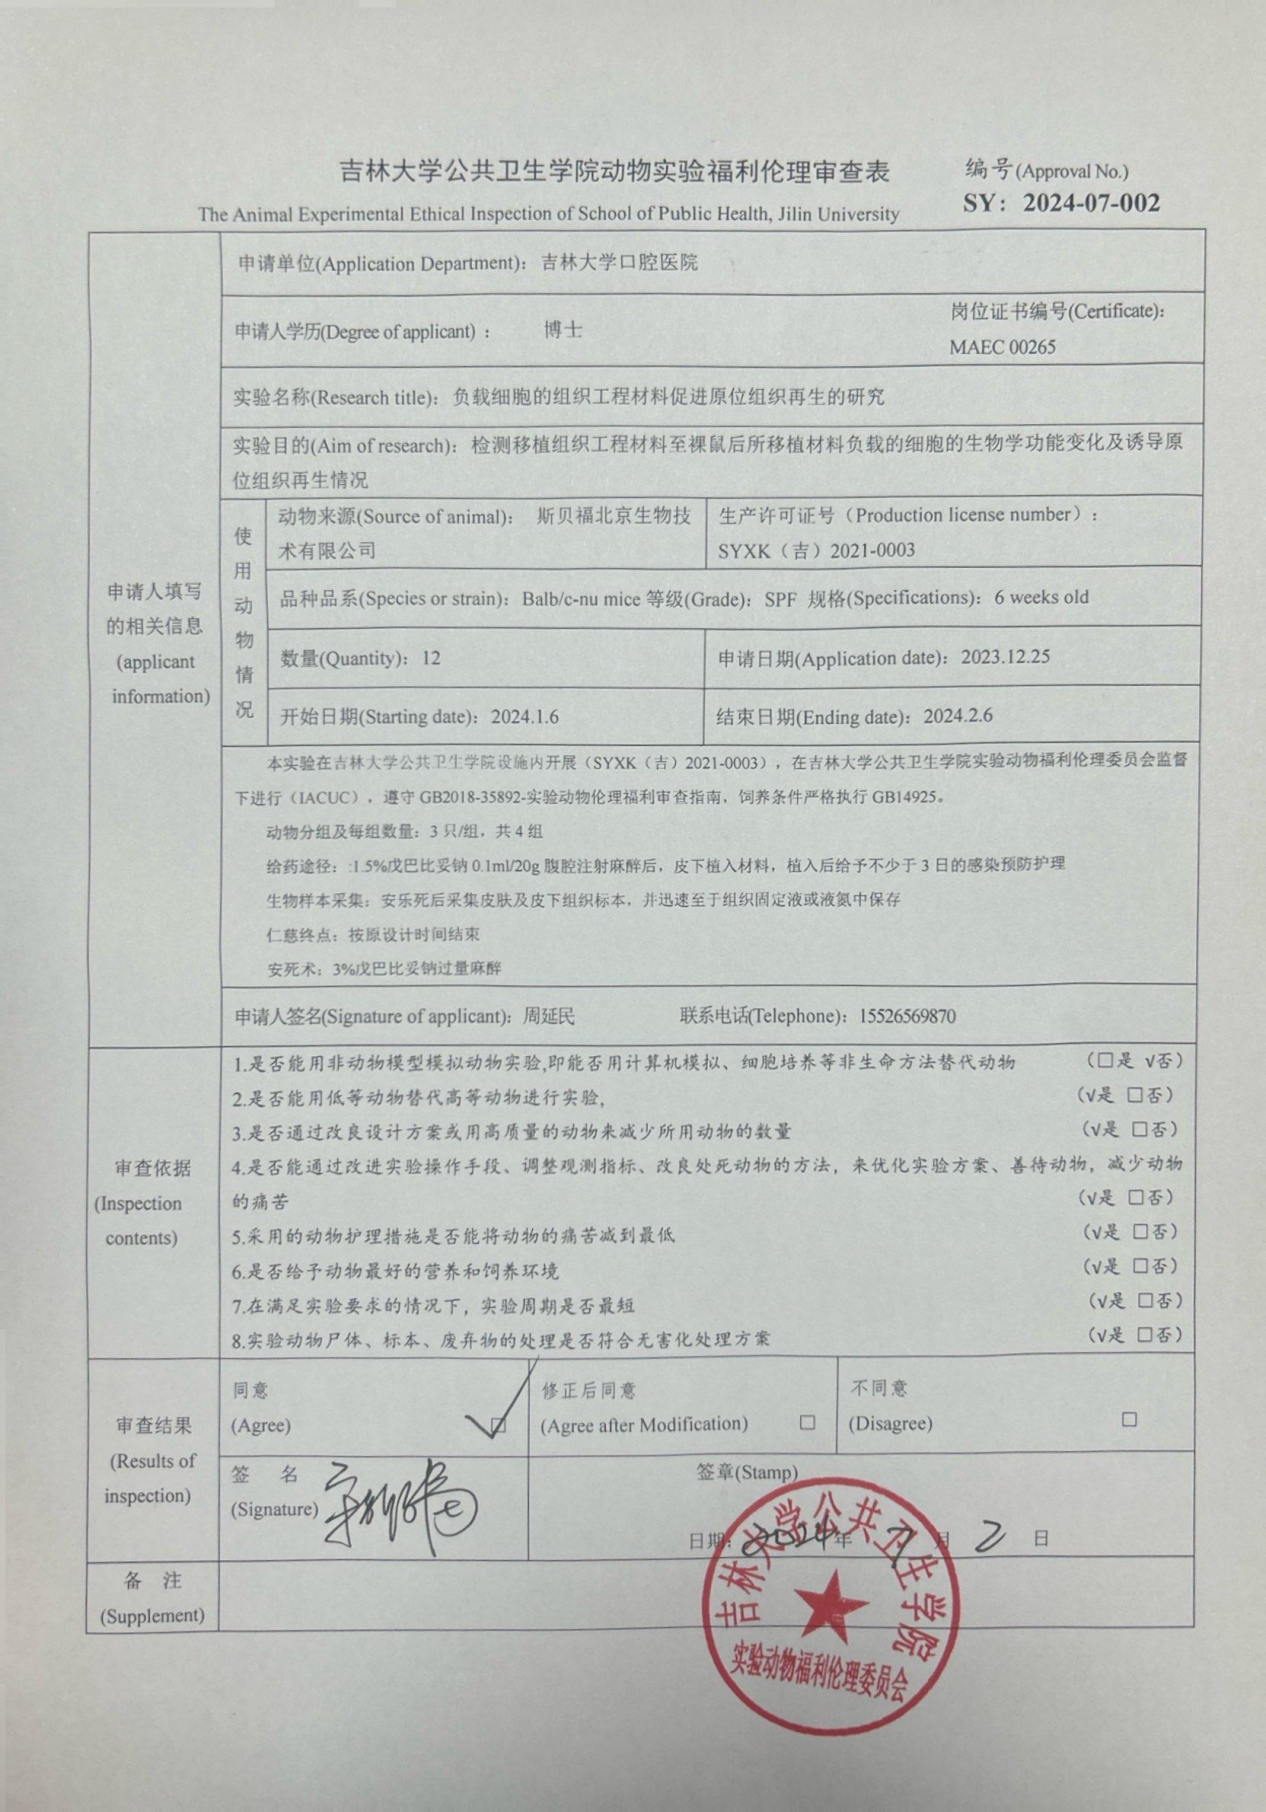


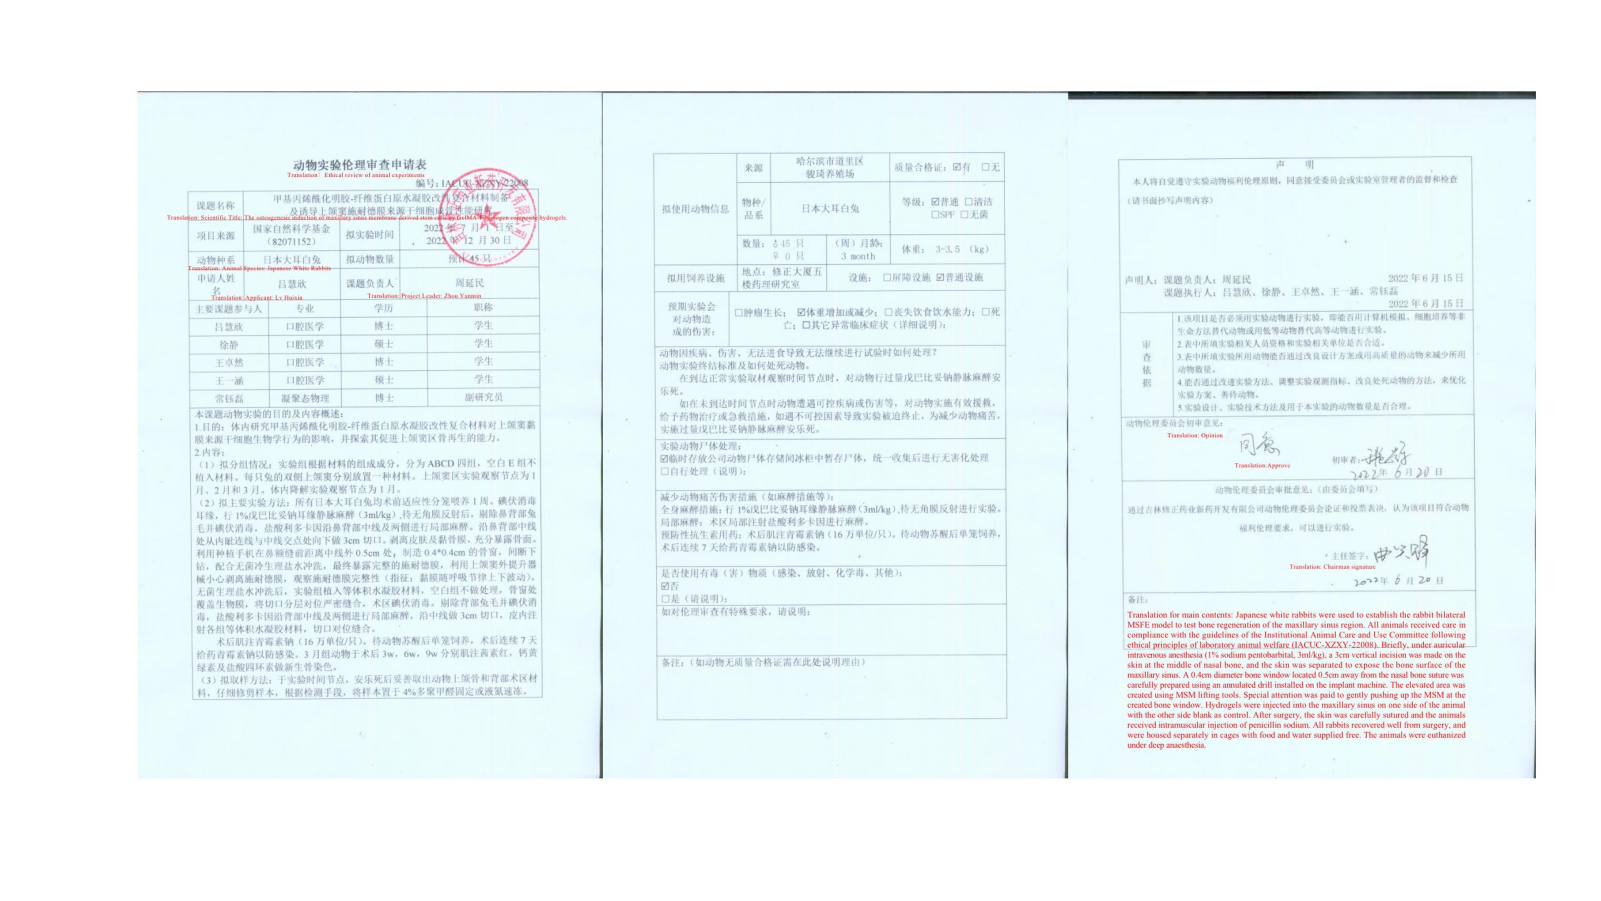


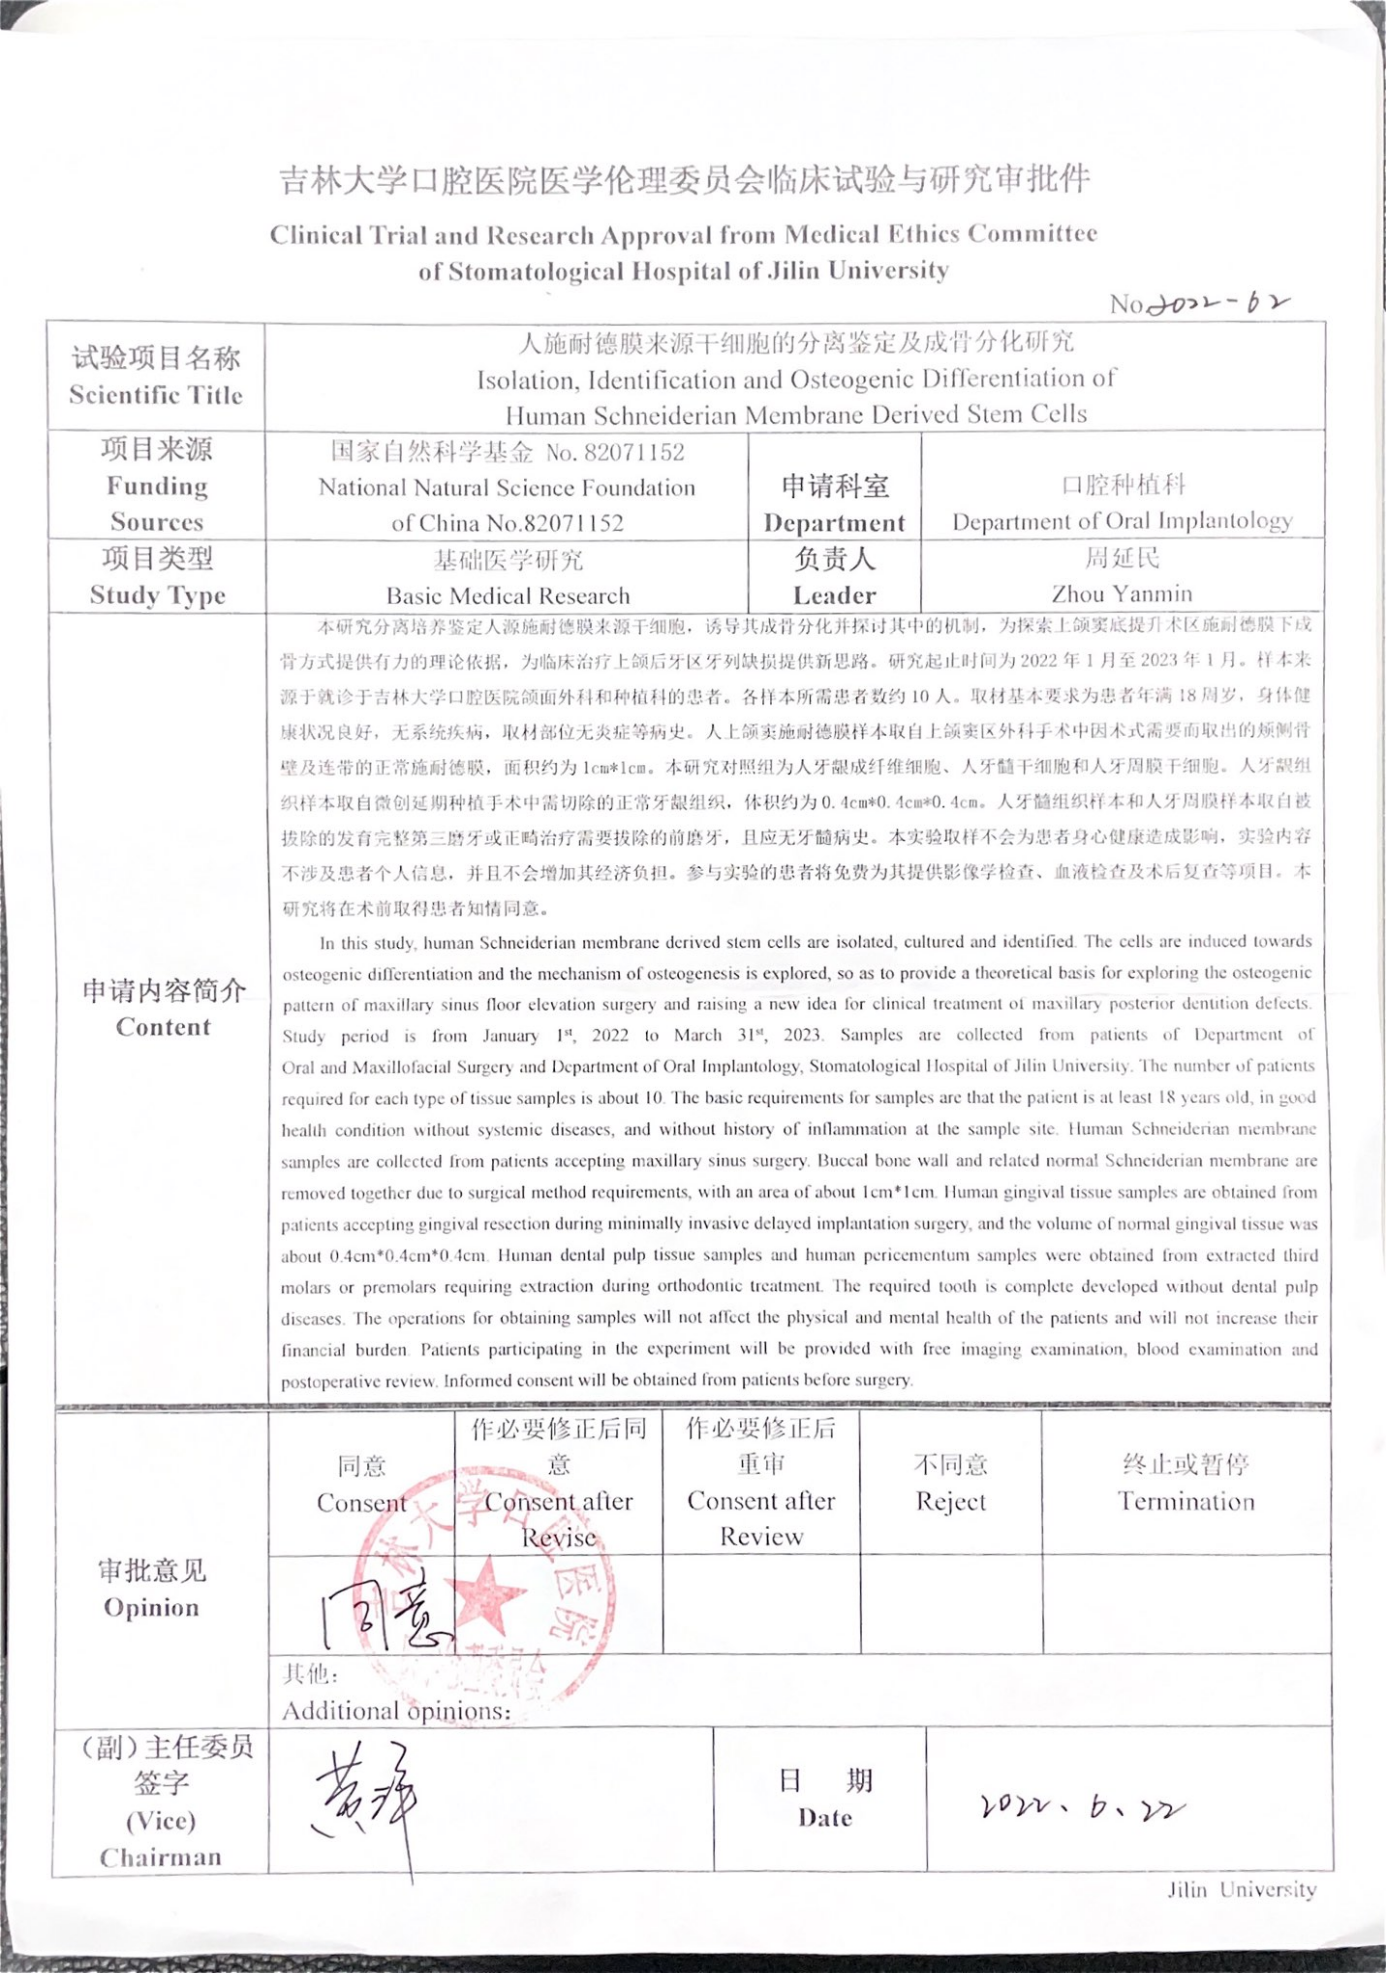

Supplement: Supplementary file 1 [file d75383efb341e4de870d7681.docx]
